# Supplementary material
Source: PubMed Central journal article supplement (PMC1630406)
Supplement: 7601376s1.pdf [file 7601376s1.pdf]

## Supplementary Figure 1

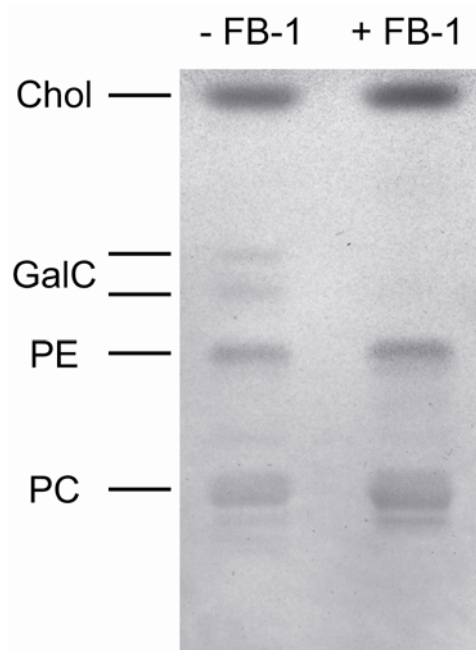

Fumonisin B1 reduces levels of galactosylceramide.

Primary oligodendrocytes were treated 12 hours after plating with 50  $\mu$ M of Fumonisin B1 (+ FB-1) or left untreated (- FB-1). The treatment was repeated every 24 hours and TLC was performed after 4 days. The positions of the reference lipids are shown: Chol, cholesterol; GalC, hydroxylated and nonhydroxylated galactosylceramide, PE, phosphatidylethanolamine; PC, phosphatidylcholine.
