# Supplementary material
Source: PubMed Central journal article supplement (PMC1630406)
Supplement: 7601376s2.pdf [file 7601376s2.pdf]

## Supplementary Figure 2

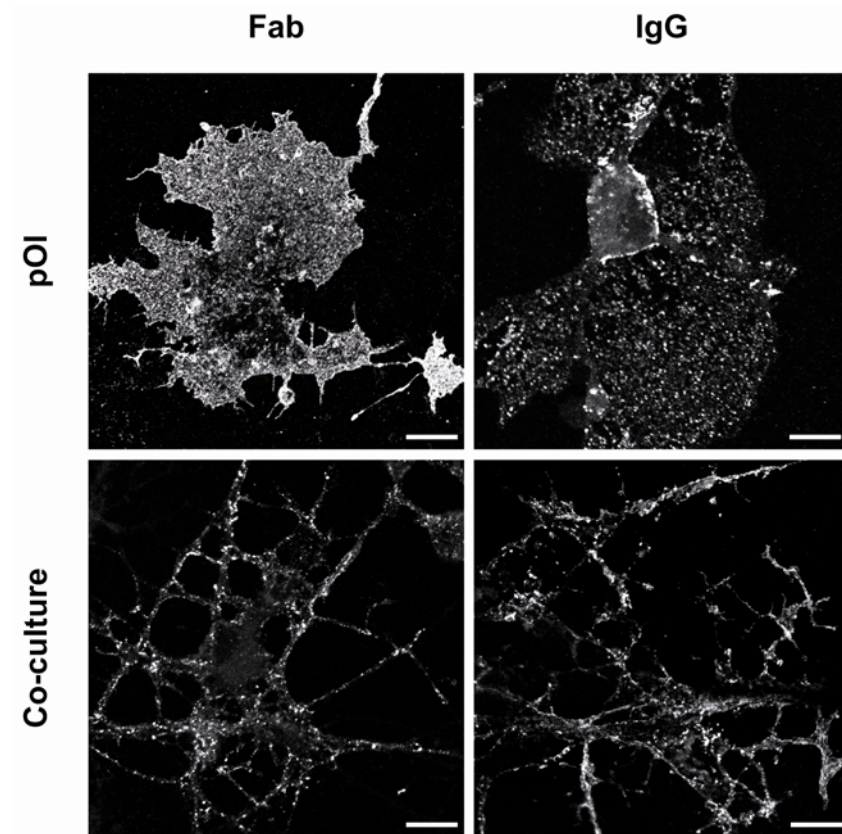

Clustering of GalC in oligodendrocytes.

Living oligodendrocytes grown with (co-culture) or without (pOI) neurons were surface stained with the primary antibody against GalC, followed by the incubation with monovalent (Fab) fragment or bivalent (IgG) secondary antibodies. In oligodendrocytes grown without neurons, the detection with IgG secondary antibodies led to the formation of much larger clusters as compared to the labelling with Fab fragments. In oligodendrocytes in co-culture with neurons, clustering of GalC was already observed with monovalent Fab fragment and the additional clustering affect of the bivalent secondary antibodies was much less pronounced.

Bars, 10  $\mu\text{m}$ .
