# Supplementary material
Source: PubMed Central journal article supplement (PMC1630406)
Supplement: 7601376s3.pdf [file 7601376s3.pdf]

### Supplementary Figure 3

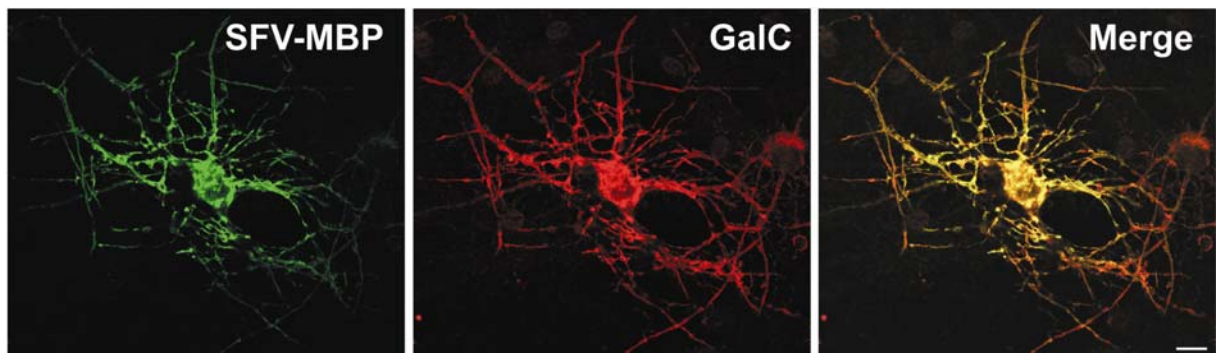

EYFP-tagged MBP is sorted to myelin.

Co-cultures were infected with recombinant SFV to express MBP-EYFP and stained for GalC to visualize myelin. Note the localization of MBP-EYFP to segments with a double outline indicative for myelin. Bars, 10  $\mu$ m.
